## Echocardiographic systolic and diastolic function alterations in multiple myeloma patients treated with Carfilzomib

Mingrone G.; Astarita A.; Maffei I.; Cesareo M.; Airale L.; Bruno G.; Vallelonga F.; Catarinella C.; Salvini M.; Bringham S.; Gay F.; Veglio F.; Milan A.

Molinette Hospital, Turin, Italy

**Funding Acknowledgements:** Type of funding sources: None.

**Background:** Carfilzomib improves the prognosis of multiple myeloma (MM) patients, but significantly increases cardiovascular toxicity. The timing and effect of carfilzomib therapy on left ventricular function is still under investigation.

**Purpose:** We sought to assess the echocardiographic systo-diastolic changes, including global longitudinal strain (GLS), in patients treated with carfilzomib and to identify predictors of increased risk of cardiovascular adverse events (CVAEs) during therapy.

**Methods:** 88 patients with MM performed a baseline cardiovascular evaluation comprehensive of transthoracic echocardiogram (TTE) before the start of Carfilzomib therapy and after about 6 months. All patients were clinically followed-up to early identify the occurrence of CVAEs for the whole therapy duration.

**Results:** After Carfilzomib treatment, mean GLS slightly decreased ( $-22.2\% \pm 2.6$  vs  $-21.3\% \pm 2.5$ ;  $p < 0.001$ ). 58% of patients experienced CVAEs during therapy: 71% of them had uncontrolled hypertension, 29% had major CVAEs or CV events not related to arterial hypertension. GLS variation during therapy was not related to an increased risk of CVAEs; however, patients with baseline  $GLS \geq -21\%$  and/or left ventricular ejection fraction (LVEF)  $\leq 60\%$  had an increased risk of major CVAEs (OR = 6.2,  $p = 0.004$ ; OR = 3.7,  $p = 0.04$ , respectively). Carfilzomib led to an increased risk of diastolic dysfunction (5.6% vs 13.4%  $p = 0.04$ ) and to a rise in  $E/e'$  ( $8.9 \pm 2.7$  vs  $9.7 \pm 3.7$ ;  $p = 0.006$ ).

**Conclusions:** Carfilzomib leads to early LV function impairment early demonstrated by GLS changes and diastolic dysfunction. Baseline echocardiographic parameters, especially GLS and LVEF, might improve cardiovascular risk stratification before treatment.
